# Supplementary material for: Magnesium Picolinate Improves Bone Formation by Regulation of RANK/RANKL/OPG and BMP-2/Runx2 Signaling Pathways in High-Fat Fed Rats
Source: MDPI journal article supplement (doi:10.3390/nu13103353), 2021-09-24
Supplement: s1 [file s1]

# **Magnesium picolinate improves bone formation by regulation of RANK/RANKL/OPG and BMP-2/Runx2 signaling pathways in high-fat-fed rats**

**Emre Sahin<sup>1</sup>, Cemal Orhan<sup>1</sup> Tansel Ansal Balci<sup>2</sup> Fusun Erten<sup>3</sup>, Kazim Sahin<sup>1\*</sup>,**

<sup>1</sup>Department of Animal Nutrition, Faculty of Veterinary Medicine, Firat University, Elazig, Turkey; [esahin@bingol.edu.tr](mailto:esahin@bingol.edu.tr) (E.S.); [nsahinkm@yahoo.com](mailto:nsahinkm@yahoo.com) (K.S.); [corhan@firat.edu.tr](mailto:corhan@firat.edu.tr) (C.O.)

<sup>2</sup>Department of Nuclear Medicine, School of Medicine, Firat University, Elazig, Turkey ; [tanselbalci@firat.edu.tr](mailto:tanselbalci@firat.edu.tr) (T.A.B.)

<sup>3</sup>Department of Veterinary Medicine, Pertek Sakine Genc Vocational School, Munzur University, Tunceli, Turkey; [fusunerten@munzur.edu.tr](mailto:fusunerten@munzur.edu.tr) (F.E.)

\*Correspondence: [nsahinkm@yahoo.com](mailto:nsahinkm@yahoo.com) (K.S.); Tel.: +90-532-7473506 Phone: +904242370000/3938

(a) RANK

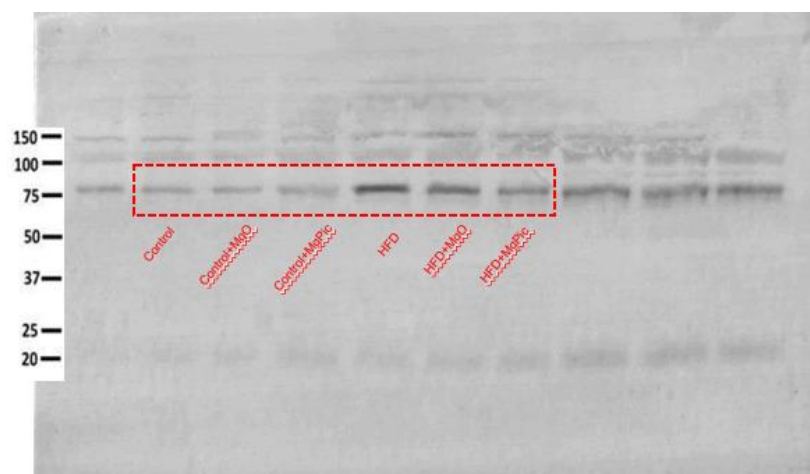

(b) RANKL

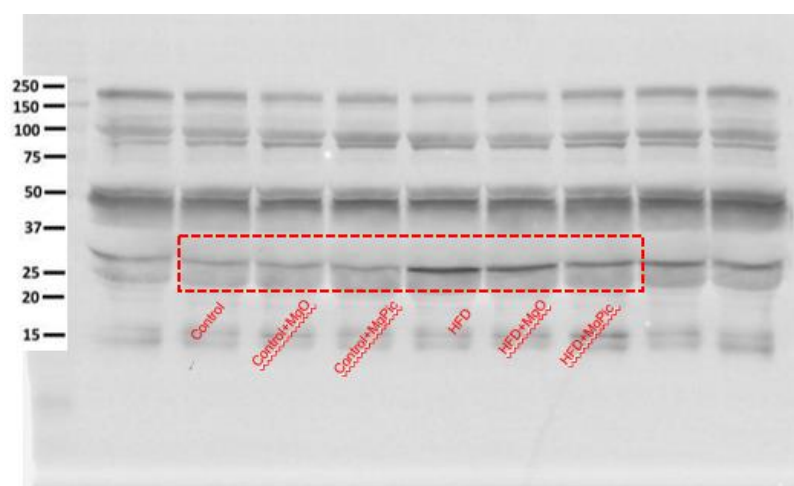

(c) OPG

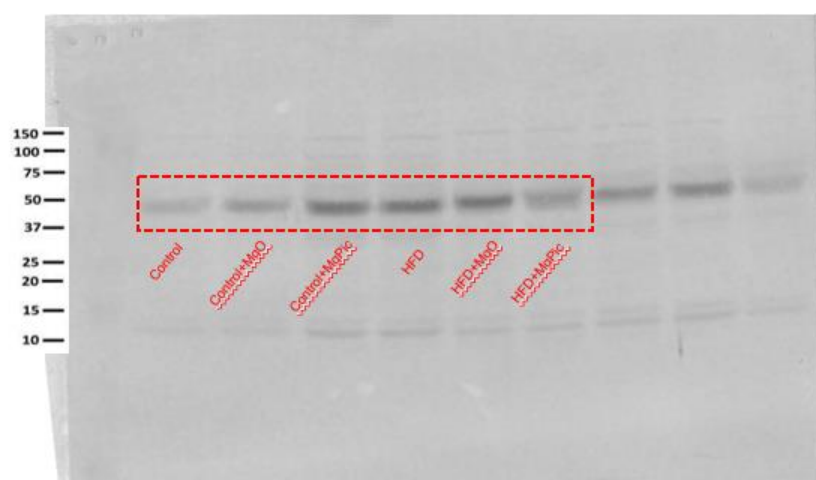

(d)  $\beta$ -Actin

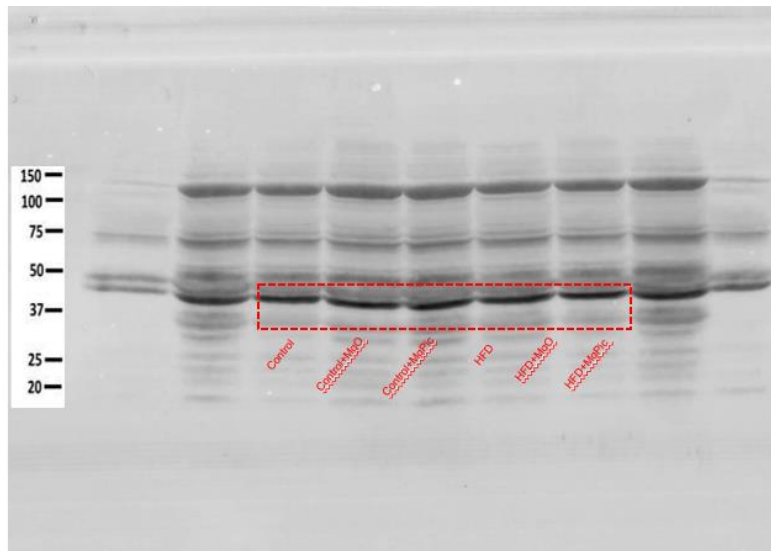

**Figure. S1.** Full immunoblots related to Fig. 1 on bone tissue in rats ((**a**) RANK, (**b**) RANKL, (**c**) OPG, and (**d**)  $\beta$ -Actin)). Each immunoblot is a representative of three independent experiments. Results shown in Fig.1 are delineated by red dotted rectangles. MW (in kDa) are indicated.

(a) IGF-1

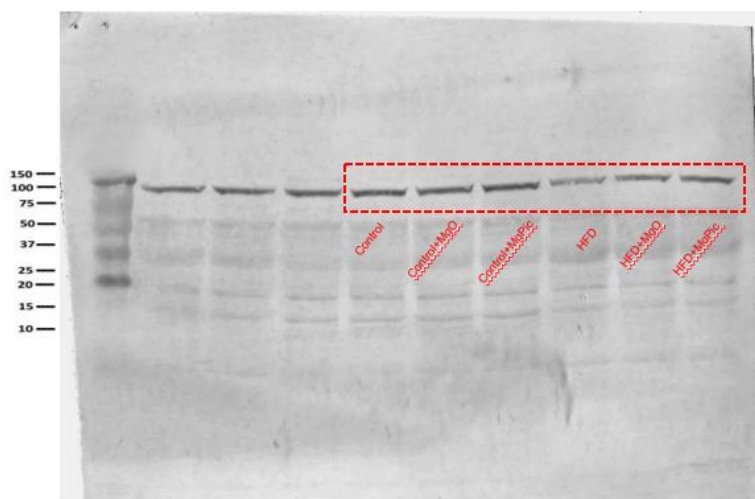

(b) BMP2

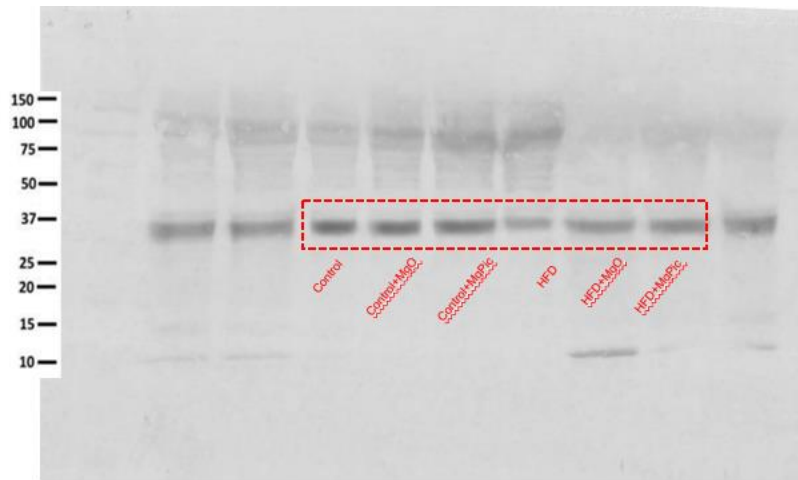

(c) OCN

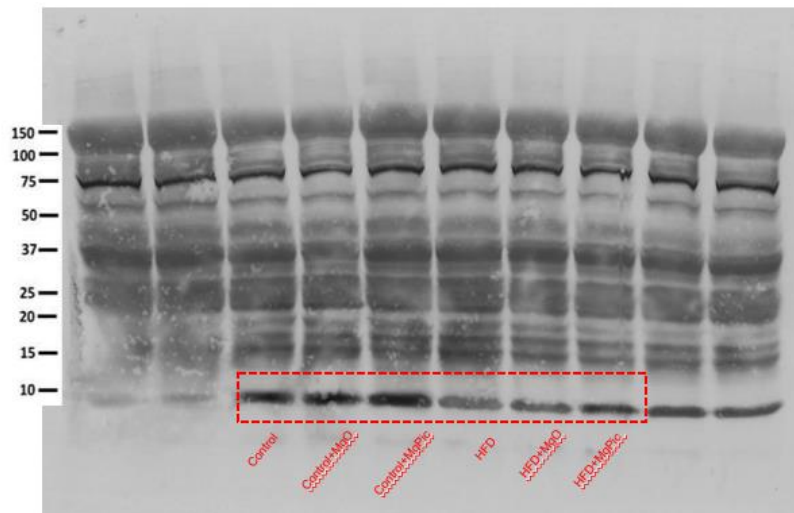

(d) COL1A1

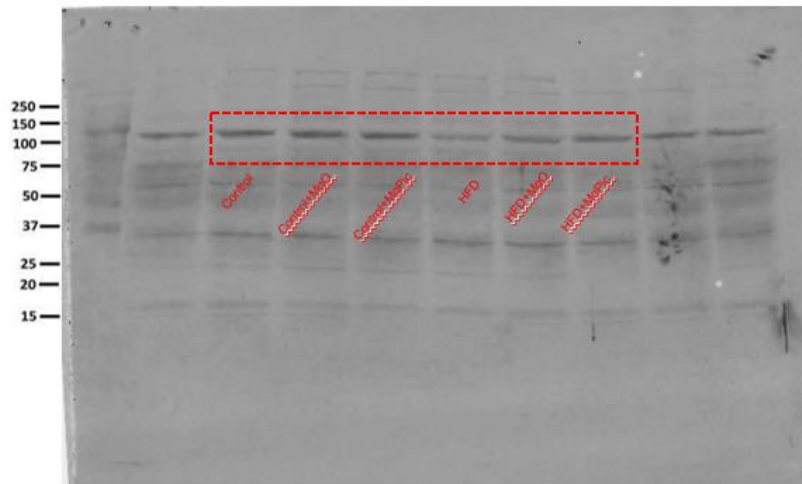

(e)  $\beta$ -Actin

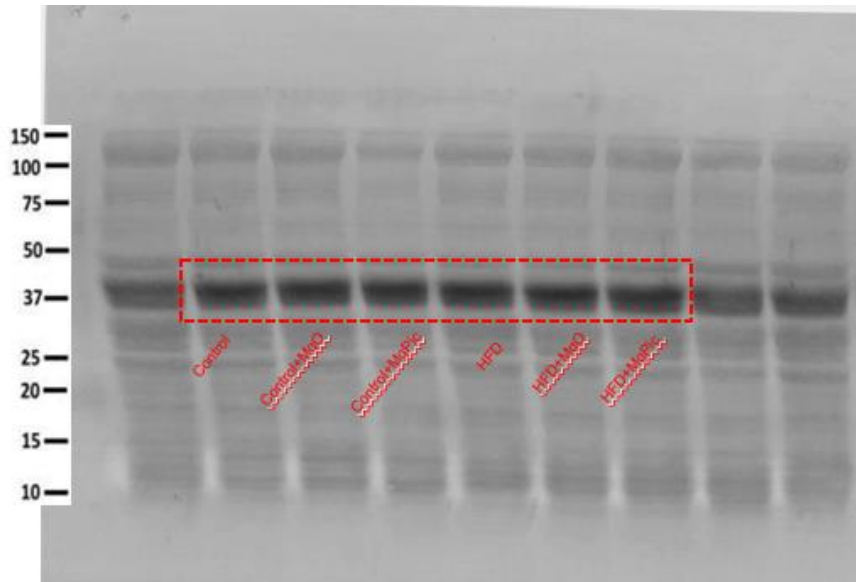

**Figure. S2.** Full immunoblots related to Fig. 2 on bone tissue in rats ((a) IGF-1, (b) BMP2, (c) OCN, (d) COL1A1, and (e)  $\beta$ -Actin)). Each immunoblot is a representative of three independent experiments. Results shown in Fig.2 are delineated by red dotted rectangles. MW (in kDa) are indicated.

(a) Runx2

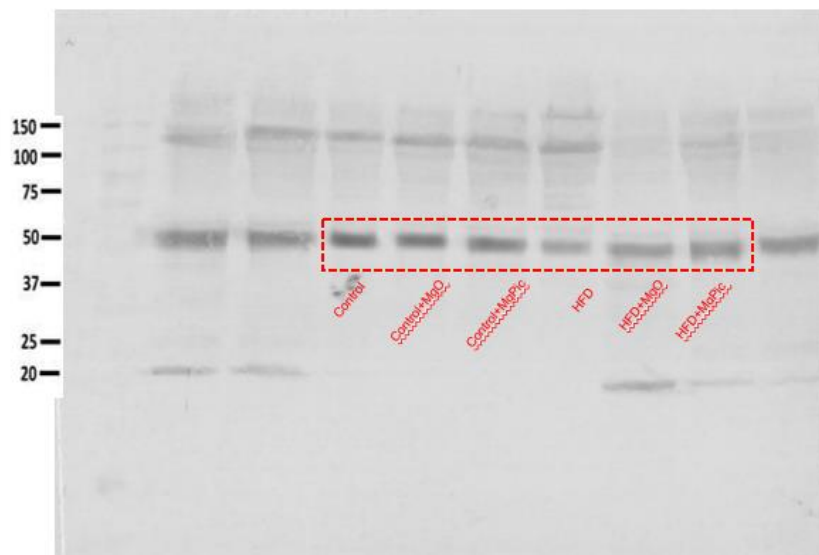

(b) Osx

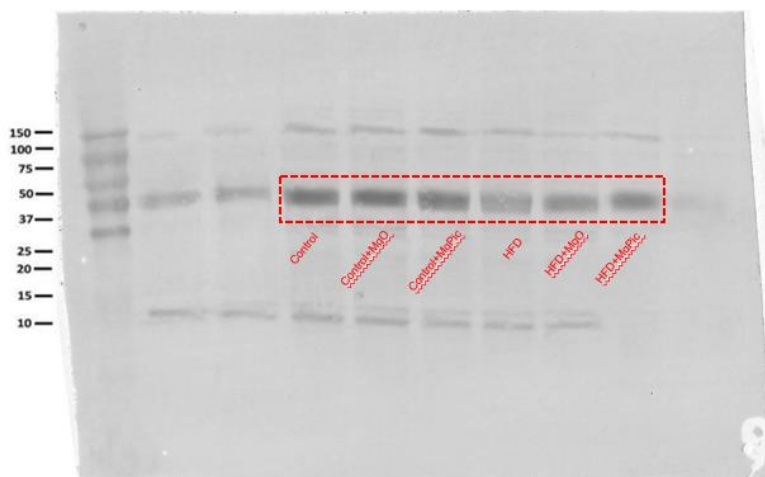

(c) SOX9

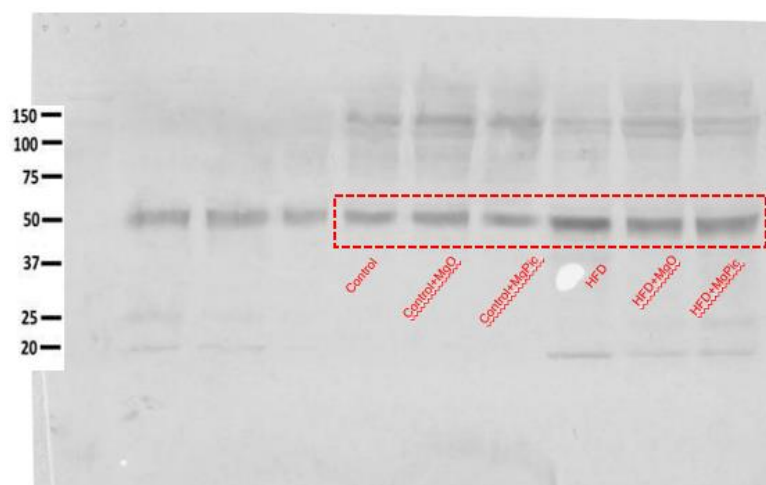

(d)  $\beta$ -Actin

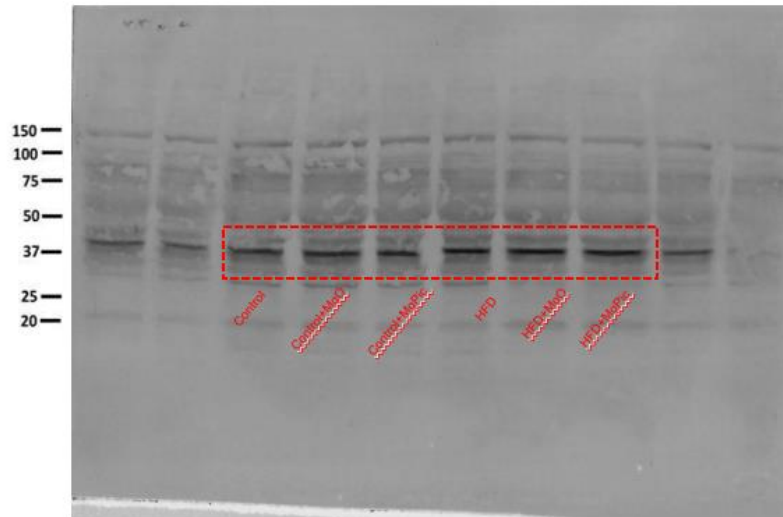

**Figure. S3.** Full immunoblots related to Fig. 3 on bone tissue in rats ((**a**) Runx2, (**b**) Osx, (**c**) SOX9, and (**d**)  $\beta$ -Actin)). Each immunoblot is a representative of three independent experiments. Results shown in Fig.3 are delineated by red dotted rectangles. MW (in kDa) are indicated.
